# Supplementary material
Source: MDPI journal article supplement (https://www.mdpi.com/2311-7524/9/2/176)
Supplement: s1 [file s1]

**Table S1:** The interaction between the five cultivars, four IAA concentrations, and four BA concentrations on the *in vitro* morphogenesis and regenerated shoots of *H. orientalis* expressed as means  $\pm$  the standard error SE.  
LSD 0.05 = least significant differences at 0.05 probability.

| Hyacinthus cultivars | NAA (mg/L) | BA (mg/L) | Days for morphogenesis | Days for Shoot proliferation | Number of shoots | Shoot height (cm) | Fresh weight (mg) | Chlorophyll a (mg/g FW.) | Chlorophyll b (mg/g FW.) |
|----------------------|------------|-----------|------------------------|------------------------------|------------------|-------------------|-------------------|--------------------------|--------------------------|
| Pink Pearl           | 0.0        | 0.0       | 0.0 ± 0.00             | 212 ± 0.13                   | 4.00 ± 0.06      | 0.85 ± 0.01       | 486 ± 0.00        | 2.2 ± 0.027              | 2.43 ± 0.03              |
|                      |            | 1.0       | 0.0 ± 0.00             | 225.3± 0.004                 | 4.66 ± 0.04      | 0.80 ± 0.01       | 771.3 ± 6.66      | 2.1 ± 0.019              | 3.03 ± 0.04              |
|                      |            | 2.0       | 193 ± 0.19             | 213 ± 0.06                   | 4.66 ± 0.04      | 0.75 ± 0.01       | 986.2 ± 16.5      | 3.1 ± 0.019              | 4.45 ± 0.05              |
|                      |            | 3.0       | 209 ± 0.13             | 228.6± 0.04                  | 6.66 ± 0.04      | 0.60 ± 0.01       | 916.7 ± 15.3      | 3.29 ± 0.019             | 4.75 ± 0.06              |
|                      | 0.5        | 0.0       | 110 ± 0.13             | 130 ± 0.13                   | 2.33 ± 0.04      | 0.95 ± 0.01       | 904.4 ± 15.2      | 1.8 ± 0.025              | 3.03 ± 0.04              |
|                      |            | 1.0       | 105 ± 0.26             | 125.3± 0.16                  | 4.00 ± 0.06      | 0.90 ± 0.01       | 1002.6 ± 16.8     | 2.1 ± 0.019              | 3.54 ± 0.04              |
|                      |            | 2.0       | 100 ± 0.13             | 120.3± 0.04                  | 5.00 ± 0.06      | 1.00 ± 0.01       | 1001.6 ± 16.8     | 3.1 ± 0.019              | 3.94 ± 0.05              |
|                      |            | 3.0       | 110 ± 0.19             | 130.3± 0.04                  | 5.33 ± 0.04      | 0.85 ± 0.01       | 910.5 ± 15.3      | 3.3 ± 0.019              | 4.55 ± 0.05              |
|                      | 1.0        | 0.0       | 106 ± 0.13             | 126 ± 0.13                   | 2.33 ± 0.04      | 1.20 ± 0.01       | 997.5 ± 16.8      | 2.0 ± 0.019              | 2.93 ± 0.03              |
|                      |            | 1.0       | 102 ± 0.13             | 122 ± 0.13                   | 5.00 ± 0.06      | 2.10 ± 0.01       | 1078.3 ± 18.1     | 2.5 ± 0.019              | 3.23 ± 0.04              |
|                      |            | 2.0       | 95 ± 0.13              | 115 ± 0.13                   | 6.00 ± 0.06      | 2.50 ± 0.01       | 1171.4 ± 19.76    | 2.7 ± 0.019              | 3.84 ± 0.05              |
|                      |            | 3.0       | 105.3 ± 0.16           | 124.6± 0.10                  | 3.66 ± 0.06      | 2.40 ± 0.01       | 908.3 ± 20.9      | 3.2 ± 0.019              | 5.16 ± 0.06              |
|                      | 1.5        | 0.0       | 115 ± 0.19             | 133.3± 0.10                  | 2.00 ± 0.06      | 1.56 ± 0.01       | 1039.4 ± 17.5     | 2.0 ± 0.020              | 3.13 ± 0.04              |
|                      |            | 1.0       | 82 ± 0.13              | 93 ± 0.19                    | 3.00 ± 0.06      | 2.30 ± 0.01       | 1037.4 ± 17.4     | 2.2 ± 0.019              | 3.94 ± 0.05              |
|                      |            | 2.0       | 85.3 ± 0.16            | 212 ± 0.13                   | 5.00 ± 0.06      | 2.45 ± 0.01       | 1145.8 ± 19.2     | 3.0 ± 0.019              | 4.35 ± 0.05              |
|                      |            | 3.0       | 90 ± 0.19              | 225.3± 0.04                  | 4.00 ± 0.04      | 2.35 ± 0.01       | 1377.9 ± 24.8     | 3.6 ± 0.023              | 4.65 ± 0.05              |
| Jan Bos              | 0.0        | 0.0       | 0.0 ± 0.37             | 222.7± 0.04                  | 3.33 ± 0.04      | 0.75 ± 0.01       | 593.8 ± 0.00      | 2.1 ± 0.019              | 2.71 ± 0.03              |
|                      |            | 1.0       | 0.0 ± 0.37             | 225 ± 0.13                   | 5.00 ± 0.06      | 0.78 ± 0.01       | 848.8 ± 0.45      | 1.96 ± 0.027             | 3.05 ± 0.04              |
|                      |            | 2.0       | 213 ± 0.06             | 229.3± 0.04                  | 4.00 ± 0.06      | 0.70 ± 0.01       | 1205 ± 0.45       | 2.9 ± 0.019              | 4.25 ± 0.05              |
|                      |            | 3.0       | 216 ± 0.13             | 239 ± 0.06                   | 5.66 ± 0.04      | 0.70 ± 0.01       | 1120 ± 0.45       | 3.0 ± 0.019              | 4.32 ± 0.05              |
|                      | 0.5        | 0.0       | 136 ± 0.13             | 135.3± 0.16                  | 3.00 ± 0.06      | 0.80 ± 0.01       | 1105 ± 0.45       | 2.1 ± 0.019              | 2.82 ± 0.03              |
|                      |            | 1.0       | 122.3 ± 0.64           | 130 ± 0.32                   | 4.66 ± 0.04      | 1.00 ± 0.01       | 1225 ± 0.45       | 2.1 ± 0.020              | 3.21 ± 0.04              |
|                      |            | 2.0       | 126 ± 0.13             | 135 ± 0.06                   | 5.00 ± 0.06      | 1.20 ± 0.01       | 1223.8 ± 0.45     | 3.0 ± 0.019              | 3.21 ± 0.04              |
|                      |            | 3.0       | 134 ± 0.13             | 135 ± 0.06                   | 4.33 ± 0.04      | 0.80 ± 0.01       | 1112.5 ± 0.45     | 3.0 ± 0.019              | 5.03 ± 0.06              |
|                      | 1.0        | 0.0       | 122.3 ± 0.69           | 122.7± 0.07                  | 3.00 ± 0.06      | 1.40 ± 0.01       | 1218.8 ± 0.45     | 2.0 ± 0.019              | 3.03 ± 0.04              |
|                      |            | 1.0       | 126 ± 0.13             | 117.7± 0.16                  | 4.66 ± 0.04      | 1.85 ± 0.01       | 1317.5 ± 0.45     | 2.2 ± 0.019              | 3.03 ± 0.04              |
|                      |            | 2.0       | 116 ± 0.13             | 108.6± 0.07                  | 6.66 ± 0.04      | 2.20 ± 0.01       | 1431.3 ± 0.45     | 2.2 ± 0.019              | 3.43 ± 0.04              |
|                      |            | 3.0       | 128 ± 0.06             | 118.6± 0.04                  | 4.00 ± 0.06      | 2.20 ± 0.01       | 1170 ± 0.45       | 3.5 ± 0.019              | 5.53 ± 0.07              |
|                      | 1.5        | 0.0       | 133 ± 0.13             | 117 ± 0.13                   | 3.00 ± 0.00      | 2.00 ± 0.01       | 1270 ± 0.45       | 2.1 ± 0.019              | 3.10 ± 0.04              |
|                      |            | 1.0       | 98 ± 0.06              | 93.3 ± 0.27                  | 4.33 ± 0.04      | 2.10 ± 0.01       | 1267.5 ± 0.45     | 2.1 ± 0.027              | 3.30 ± 0.05              |
|                      |            | 2.0       | 99 ± 0.06              | 92.7 ± 0.07                  | 5.00 ± 0.06      | 2.40 ± 0.01       | 1400 ± 0.45       | 2.4 ± 0.023              | 4.03 ± 0.05              |
|                      |            | 3.0       | 102 ± 0.13             | 96.3 ± 0.07                  | 3.66 ± 0.04      | 2.25 ± 0.01       | 1276.3 ± 0.45     | 3.9 ± 0.019              | 4.25 ± 0.05              |
| Blue Pearl           | 0.0        | 0.0       | 0.0 ± 0.00             | 0.0 ± 0.00                   | 0.00 ± 0.00      | 0.00 ± 0.00       | 0.00 ± 0.00       | 2.8 ± 0.019              | 2.55 ± 0.01              |
|                      |            | 1.0       | 0.0 ± 0.00             | 219.3± 0.04                  | 5.00 ± 0.06      | 0.85 ± 0.02       | 950.6 ± 0.52      | 2.2 ± 0.019              | 2.84 ± 0.01              |
|                      |            | 2.0       | 223 ± 0.19             | 230 ± 0.13                   | 5.33 ± 0.04      | 0.90 ± 0.02       | 1203 ± 0.6        | 3.4 ± 0.019              | 4.39 ± 0.02              |
|                      |            | 3.0       | 229 ± 0.13             | 227.7± 0.10                  | 4.00 ± 0.06      | 0.80 ± 0.02       | 1254.4 ± 0.52     | 4.2 ± 0.019              | 4.51 ± 0.02              |
|                      | 0.5        | 0.0       | 125 ± 0.13             | 146 ± 0.06                   | 4.33 ± 0.04      | 0.85 ± 0.02       | 1237.6 ± 0.52     | 2.0 ± 0.019              | 2.50 ± 0.01              |
|                      |            | 1.0       | 120 ± 0.32             | 140 ± 0.06                   | 3.00 ± 0.06      | 0.95 ± 0.02       | 1372 ± 0.52       | 2.2 ± 0.019              | 3.17 ± 0.02              |
|                      |            | 2.0       | 115.3 ± 0.16           | 135.3± 0.07                  | 4.00 ± 0.06      | 1.50 ± 0.02       | 1370.6 ± 0.52     | 3.4 ± 0.019              | 3.71 ± 0.02              |
|                      |            | 3.0       | 126 ± 0.13             | 146.3± 0.04                  | 5.67 ± 0.04      | 1.20 ± 0.02       | 1246 ± 0.52       | 3.6 ± 0.019              | 4.57 ± 0.02              |
|                      | 1.0        | 0.0       | 122 ± 0.13             | 146.3± 0.04                  | 3.33 ± 0.04      | 2.00 ± 0.02       | 1349.6 ± 0.52     | 2.0 ± 0.019              | 2.83 ± 0.01              |
|                      |            | 1.0       | 117.6 ± 0.16           | 135 ± 0.06                   | 4.33 ± 0.04      | 2.20 ± 0.02       | 1475.6 ± 0.52     | 2.8 ± 0.019              | 3.03 ± 0.02              |
|                      |            | 2.0       | 107.6 ± 0.16           | 122 ± 0.13                   | 5.00 ± 0.06      | 2.60 ± 0.02       | 1365 ± 0.52       | 3.1 ± 0.019              | 4.47 ± 0.03              |
|                      |            | 3.0       | 119 ± 0.06             | 135 ± 0.13                   | 4.33 ± 0.04      | 2.50 ± 0.02       | 1310.4 ± 0.52     | 3.6 ± 0.019              | 5.51 ± 0.02              |
|                      | 1.5        | 0.0       | 117 ± 0.13             | 153 ± 0.06                   | 3.00 ± 0.00      | 2.20 ± 0.02       | 1422.4 ± 0.52     | 2.4 ± 0.013              | 3.60 ± 0.01              |
|                      |            | 1.0       | 93.3 ± 0.27            | 106 ± 0.93                   | 5.00 ± 0.06      | 2.30 ± 0.02       | 1419.6 ± 0.52     | 2.6 ± 0.019              | 3.21 ± 0.05              |
|                      |            | 2.0       | 92 ± 0.13              | 109.7± 0.04                  | 6.00 ± 0.06      | 2.50 ± 0.02       | 1568 ± 0.52       | 3.2 ± 0.019              | 4.31 ± 0.02              |
|                      |            | 3.0       | 97 ± 0.13              | 113.3± 0.69                  | 4.33 ± 0.04      | 2.30 ± 0.02       | 1429.4 ± 0.52     | 4.2 ± 0.019              | 5.57 ± 0.02              |
| Serene Blue          | 0.0        | 0.0       | 0.0 ± 0.00             | 0.0 ± 0.00                   | 0.00 ± 0.00      | 0.00 ± 0.00       | 0.00 ± 0.00       | 2.9 ± 0.026              | 2.55 ± 0.01              |
|                      |            | 1.0       | 0.0 ± 0.00             | 0.0 ± 0.00                   | 0.00 ± 0.00      | 0.00 ± 0.00       | 916.7 ± 0.39      | 2.85 ± 0.026             | 4.33 ± 0.03              |
|                      |            | 2.0       | 220 ± 0.13             | 219.3± 0.07                  | 4.33 ± 0.04      | 1.00 ± 0.01       | 1179.1 ± 0.38     | 3.9 ± 0.026              | 4.37 ± 0.03              |
|                      |            | 3.0       | 232 ± 0.13             | 232.7± 0.07                  | 5.33 ± 0.04      | 0.27 ± 0.00       | 1209.6 ± 0.39     | 4.0 ± 0.026              | 5.71 ± 0.09              |
|                      | 0.5        | 0.0       | 138 ± 0.13             | 153 ± 0.06                   | 2.33 ± 0.04      | 0.90 ± 0.01       | 1011 ± 0.61       | 2.9 ± 0.026              | 5.02 ± 0.04              |
|                      |            | 1.0       | 125 ± 0.13             | 140 ± 0.06                   | 3.33 ± 0.04      | 1.00 ± 0.01       | 1323 ± 0.39       | 2.9 ± 0.026              | 4.24 ± 0.03              |
|                      |            | 2.0       | 127 ± 0.13             | 140 ± 0.13                   | 5.00 ± 0.06      | 1.50 ± 0.01       | 1321.7 ± 0.39     | 3.0 ± 0.026              | 4.32 ± 0.03              |
|                      |            | 3.0       | 136 ± 0.13             | 153 ± 0.06                   | 5.67 ± 0.04      | 1.40 ± 0.01       | 1201.5 ± 0.39     | 4.0 ± 0.026              | 4.37 ± 0.03              |
|                      | 1.0        | 0.0       | 131 ± 0.06             | 158.7± 0.04                  | 3.33 ± 0.04      | 2.20 ± 0.01       | 1301.4 ± 0.39     | 2.9 ± 0.026              | 6.27 ± 0.04              |
|                      |            | 1.0       | 126 ± 0.13             | 146.7± 0.07                  | 4.00 ± 0.00      | 2.30 ± 0.01       | 1422.9 ± 0.39     | 2.9 ± 0.026              | 3.87 ± 0.02              |
|                      |            | 2.0       | 119 ± 0.06             | 128.7± 0.97                  | 6.00 ± 0.04      | 2.60 ± 0.01       | 1316.3 ± 0.39     | 3.0 ± 0.026              | 4.15 ± 0.03              |
|                      |            | 3.0       | 130 ± 0.06             | 152 ± 0.06                   | 3.67 ± 0.07      | 2.50 ± 0.01       | 1263.6 ± 0.39     | 4.1 ± 0.026              | 4.99 ± 0.03              |
|                      | 1.5        | 0.0       | 135 ± 0.13             | 152.7± 0.16                  | 2.33 ± 0.06      | 2.30 ± 0.01       | 1371.6 ± 0.39     | 2.6 ± 0.026              | 6.83 ± 0.05              |
|                      |            | 1.0       | 98 ± 0.13              | 113.3± 0.39                  | 4.33 ± 0.04      | 2.50 ± 0.01       | 1368.9 ± 0.39     | 2.8 ± 0.026              | 4.26 ± 0.03              |
|                      |            | 2.0       | 102 ± 0.13             | 120 ± 0.06                   | 5.67 ± 0.04      | 2.60 ± 0.01       | 1512 ± 0.39       | 3.3 ± 0.026              | 5.17 ± 0.04              |
|                      |            | 3.0       | 105 ± 0.13             | 98.7 ± 0.10                  | 3.33 ± 0.04      | 2.40 ± 0.01       | 1378.4 ± 0.39     | 4.5 ± 0.026              | 4.83 ± 0.01              |
| White Pearl          | 0.0        | 0.0       | 0.0 ± 0.00             | 0.0 ± 0.00                   | 0.00 ± 0.00      | 0.07 ± 0.01       | 0.00 ± 0.00       | 2.1 ± 0.016              | 1.71 ± 0.02              |
|                      |            | 1.0       | 0.0 ± 0.00             | 0.0 ± 0.00                   | 0.00 ± 0.00      | 0.07 ± 0.01       | 637.9 ± 0.48      | 1.75 ± 0.013             | 2.32 ± 0.02              |
|                      |            | 2.0       | 225.6 ± 0.04           | 243.7± 0.07                  | 4.00 ± 0.00      | 0.92 ± 0.01       | 905.8 ± 0.48      | 2.5 ± 0.017              | 2.15 ± 0.02              |
|                      |            | 3.0       | 240.6 ± 0.07           | 230 ± 0.06                   | 4.00 ± 0.06      | 0.77 ± 0.01       | 841.9 ± 0.48      | 2.4 ± 0.016              | 3.29 ± 0.04              |
|                      | 0.5        | 0.0       | 133.3 ± 0.10           | 140.3± 0.10                  | 2.33 ± 0.04      | 1.02 ± 0.01       | 676.4 ± 0.45      | 1.1 ± 0.017              | 1.86 ± 0.02              |
|                      |            | 1.0       | 127.6 ± 0.04           | 145 ± 0.13                   | 3.00 ± 0.06      | 1.07 ± 0.01       | 920.9 ± 0.48      | 1.6 ± 0.020              | 2.38 ± 0.02              |
|                      |            | 2.0       | 116.6 ± 0.04           | 126 ± 0.13                   | 4.33 ± 0.04      | 1.37 ± 0.01       | 919.9 ± 0.48      | 2.5 ± 0.020              | 2.77 ± 0.02              |
|                      |            | 3.0       | 127.3 ± 0.04           | 149.7± 0.10                  | 3.67 ± 0.04      | 1.07 ± 0.01       | 836.3 ± 0.48      | 2.4 ± 0.013              | 3.35 ± 0.03              |
|                      | 1.0        | 0.0       | 123.3 ± 0.04           | 136 ± 0.13                   | 3.00 ± 0.06      | 1.57 ± 0.01       | 916.2 ± 0.48      | 1.4 ± 0.020              | 1.95 ± 0.02              |
|                      |            | 1.0       | 123.6 ± 0.07           | 142.3± 0.16                  | 5.00 ± 0.06      | 2.37 ± 0.01       | 990.4 ± 0.48      | 1.9 ± 0.013              | 2.17 ± 0.01              |
|                      |            | 2.0       | 118.3 ± 0.04           | 134.7± 0.10                  | 5.00 ± 0.00      | 2.47 ± 0.01       | 1076 ± 0.48       | 2.3 ± 0.013              | 2.96 ± 0.02              |
|                      |            | 3.0       | 127.6 ± 0.04           | 153 ± 0.06                   | 3.67 ± 0.04      | 2.27 ± 0.01       | 879.5 ± 0.48      | 2.6 ± 0.014              | 3.03 ± 0.02              |
|                      | 1.5        | 0.0       | 126.3 ± 0.04           | 133.3± 0.10                  | 2.00 ± 0.00      | 1.67 ± 0.01       | 954.7 ± 0.48      | 1.5 ± 0.016              | 2.68 ± 0.04              |
|                      |            | 1.0       | 99.3 ± 0.04            | 105.7± 0.04                  | 4.00 ± 0.06      | 2.57 ± 0.01       | 952.8 ± 0.48      | 1.7 ± 0.017              | 2.80 ± 0.02              |
|                      |            | 2.0       | 99.3 ± 0.04            | 105.7± 0.04                  | 5.33 ± 0.04      | 2.47 ± 0.01       | 1052.5 ± 0.48     | 2.3 ± 0.013              | 3.09 ± 0.01              |
|                      |            | 3.0       | 93.3 ± 0.07            | 108.3± 0.04                  | 3.67 ± 0.04      | 2.32 ± 0.01       | 959.4 ± 0.48      | 2.4 ± 0.015              | 3.34 ± 0.02              |
| LSD 0.05             |            |           | 3.36                   | 2.97                         | 1.45             | 0.83              | 18.21             | 1.24                     | 1.54                     |

**Table S2:** The interaction between the five cultivars, four IAA concentrations, and four Kin concentrations on the *in vitro* morphogenesis and regenerated shoots of *H. orientalis* expressed as means  $\pm$  the standard error SE.  
LSD 0.05 = least significant differences at 0.05 probability.

| Hyalanthus cultivars | NAA (mg/L) | BA (mg/L) | Days for morphogenesis | Days for Shoot proliferation | Number of shoots | Shoot height (cm) | Fresh weight (mg) | Chlorophyll a (mg/g FW.) | Chlorophyll b (mg/g FW.) |
|----------------------|------------|-----------|------------------------|------------------------------|------------------|-------------------|-------------------|--------------------------|--------------------------|
| Pink Pearl           | 0.0        | 0.0       | 0.0 $\pm$ 0.0          | 238.20 $\pm$ 0.00            | 2.95 $\pm$ 0.05  | 0.73 $\pm$ 0.009  | 360.0 $\pm$ 0.77  | 1.83 $\pm$ 0.031         | 2.74 $\pm$ 0.06          |
|                      |            | 1.0       | 0.0 $\pm$ 0.0          | 252.50 $\pm$ 0.00            | 3.68 $\pm$ 0.06  | 0.69 $\pm$ 0.008  | 360.0 $\pm$ 0.74  | 1.70 $\pm$ 0.029         | 2.65 $\pm$ 0.06          |
|                      |            | 2.0       | 241.6 $\pm$ 0.32       | 239.3 $\pm$ 0.32             | 3.68 $\pm$ 0.06  | 0.64 $\pm$ 0.008  | 281.2 $\pm$ 0.77  | 2.56 $\pm$ 0.043         | 3.88 $\pm$ 0.08          |
|                      |            | 3.0       | 260.8 $\pm$ 0.32       | 256.90 $\pm$ 0.32            | 5.16 $\pm$ 0.09  | 0.52 $\pm$ 0.006  | 298.0 $\pm$ 3.08  | 3.35 $\pm$ 0.056         | 4.50 $\pm$ 0.10          |
|                      | 0.5        | 0.0       | 142.0 $\pm$ 0.32       | 148.0 $\pm$ 0.32             | 1.47 $\pm$ 0.02  | 0.82 $\pm$ 0.01   | 169.6 $\pm$ 0.77  | 1.70 $\pm$ 0.03          | 2.65 $\pm$ 0.06          |
|                      |            | 1.0       | 136.0 $\pm$ 0.32       | 142.5 $\pm$ 0.32             | 2.95 $\pm$ 0.05  | 0.77 $\pm$ 0.009  | 163.6 $\pm$ 0.74  | 1.95 $\pm$ 0.033         | 3.09 $\pm$ 0.07          |
|                      |            | 2.0       | 130.0 $\pm$ 0.32       | 137.0 $\pm$ 0.32             | 3.68 $\pm$ 0.06  | 0.86 $\pm$ 0.01   | 150.4 $\pm$ 0.77  | 1.95 $\pm$ 0.03          | 3.44 $\pm$ 0.07          |
|                      |            | 3.0       | 142.0 $\pm$ 0.32       | 148.0 $\pm$ 0.32             | 3.68 $\pm$ 0.06  | 0.73 $\pm$ 0.009  | 162.4 $\pm$ 1.08  | 3.04 $\pm$ 0.05          | 3.97 $\pm$ 0.09          |
|                      | 1.0        | 0.0       | 137.2 $\pm$ 0.32       | 143.6 $\pm$ 0.32             | 1.47 $\pm$ 0.02  | 1.03 $\pm$ 0.012  | 157.6 $\pm$ 0.77  | 1.83 $\pm$ 0.03          | 2.56 $\pm$ 0.05          |
|                      |            | 1.0       | 132.4 $\pm$ 0.32       | 139.2 $\pm$ 0.32             | 3.68 $\pm$ 0.06  | 1.80 $\pm$ 0.021  | 157.6 $\pm$ 0.74  | 1.83 $\pm$ 0.031         | 2.82 $\pm$ 0.06          |
|                      |            | 2.0       | 124.0 $\pm$ 0.32       | 131.5 $\pm$ 0.32             | 4.42 $\pm$ 0.07  | 2.15 $\pm$ 0.025  | 151.6 $\pm$ 0.77  | 2.07 $\pm$ 0.035         | 3.35 $\pm$ 0.07          |
|                      |            | 3.0       | 136.0 $\pm$ 0.32       | 142.5 $\pm$ 0.32             | 2.95 $\pm$ 0.05  | 2.06 $\pm$ 0.024  | 163.6 $\pm$ 0.31  | 2.62 $\pm$ 0.044         | 4.15 $\pm$ 0.09          |
|                      | 1.5        | 0.0       | 148.0 $\pm$ 0.32       | 151.3 $\pm$ 0.32             | 1.47 $\pm$ 0.02  | 1.34 $\pm$ 0.016  | 161.2 $\pm$ 0.77  | 1.64 $\pm$ 0.028         | 2.12 $\pm$ 0.05          |
|                      |            | 1.0       | 60.4 $\pm$ 0.32        | 74.3 $\pm$ 0.32              | 2.21 $\pm$ 0.04  | 1.98 $\pm$ 0.023  | 92.80 $\pm$ 0.74  | 2.13 $\pm$ 0.036         | 3.44 $\pm$ 0.07          |
|                      |            | 2.0       | 64.0 $\pm$ 0.32        | 77.6 $\pm$ 0.32              | 3.68 $\pm$ 0.06  | 2.11 $\pm$ 0.02   | 737.7 $\pm$ 0.77  | 2.43 $\pm$ 0.04          | 3.79 $\pm$ 0.08          |
|                      |            | 3.0       | 70.0 $\pm$ 0.32        | 79.80 $\pm$ 0.32             | 2.95 $\pm$ 0.05  | 2.02 $\pm$ 0.024  | 732.6 $\pm$ 0.77  | 2.56 $\pm$ 0.043         | 4.06 $\pm$ 0.09          |
| Jan Bos              | 0.0        | 0.0       | 0.0 $\pm$ 0.0          | 250.30 $\pm$ 0.00            | 2.95 $\pm$ 0.05  | 0.64 $\pm$ 0.008  | 429.3 $\pm$ 0.74  | 1.83 $\pm$ 0.031         | 2.65 $\pm$ 0.06          |
|                      |            | 1.0       | 0.0 $\pm$ 0.0          | 252.50 $\pm$ 0.00            | 3.68 $\pm$ 0.06  | 0.67 $\pm$ 0.008  | 555.2 $\pm$ 0.77  | 1.70 $\pm$ 0.03          | 2.47 $\pm$ 0.05          |
|                      |            | 2.0       | 277.6 $\pm$ 0.32       | 256.9 $\pm$ 0.32             | 2.95 $\pm$ 0.05  | 0.60 $\pm$ 0.007  | 809.5 $\pm$ 0.74  | 2.56 $\pm$ 0.04          | 3.71 $\pm$ 0.08          |
|                      |            | 3.0       | 284.8 $\pm$ 0.32       | 267.9 $\pm$ 0.32             | 4.42 $\pm$ 0.07  | 0.60 $\pm$ 0.007  | 613.5 $\pm$ 0.74  | 3.35 $\pm$ 0.056         | 4.85 $\pm$ 0.10          |
|                      | 0.5        | 0.0       | 160.0 $\pm$ 0.32       | 153.5 $\pm$ 0.32             | 2.21 $\pm$ 0.04  | 0.69 $\pm$ 0.008  | 798.7 $\pm$ 0.74  | 1.70 $\pm$ 0.03          | 2.47 $\pm$ 0.05          |
|                      |            | 1.0       | 154.0 $\pm$ 0.32       | 148.0 $\pm$ 0.32             | 3.68 $\pm$ 0.06  | 0.86 $\pm$ 0.01   | 703.7 $\pm$ 0.47  | 1.95 $\pm$ 0.03          | 2.82 $\pm$ 0.06          |
|                      |            | 2.0       | 148.0 $\pm$ 0.32       | 153.5 $\pm$ 0.32             | 3.68 $\pm$ 0.06  | 1.03 $\pm$ 0.012  | 804.1 $\pm$ 0.74  | 1.95 $\pm$ 0.03          | 2.82 $\pm$ 0.06          |
|                      |            | 3.0       | 161.2 $\pm$ 0.32       | 153.5 $\pm$ 0.32             | 2.95 $\pm$ 0.05  | 0.69 $\pm$ 0.008  | 885.4 $\pm$ 0.74  | 3.04 $\pm$ 0.05          | 4.41 $\pm$ 0.09          |
|                      | 1.0        | 0.0       | 156.4 $\pm$ 0.32       | 139.2 $\pm$ 0.32             | 2.21 $\pm$ 0.04  | 1.20 $\pm$ 0.014  | 1034 $\pm$ 0.74   | 1.83 $\pm$ 0.03          | 2.65 $\pm$ 0.06          |
|                      |            | 1.0       | 151.6 $\pm$ 0.32       | 134.8 $\pm$ 0.32             | 3.68 $\pm$ 0.06  | 1.59 $\pm$ 0.019  | 738.4 $\pm$ 2.58  | 1.83 $\pm$ 0.031         | 2.65 $\pm$ 0.06          |
|                      |            | 2.0       | 139.6 $\pm$ 0.32       | 123.8 $\pm$ 0.32             | 5.16 $\pm$ 0.09  | 1.89 $\pm$ 0.022  | 845.6 $\pm$ 0.74  | 2.07 $\pm$ 0.035         | 3.00 $\pm$ 0.06          |
|                      |            | 3.0       | 152.8 $\pm$ 0.32       | 135.9 $\pm$ 0.32             | 2.95 $\pm$ 0.05  | 1.89 $\pm$ 0.022  | 952.2 $\pm$ 0.74  | 2.62 $\pm$ 0.044         | 3.79 $\pm$ 0.08          |
|                      | 1.5        | 0.0       | 150.4 $\pm$ 0.32       | 133.7 $\pm$ 0.32             | 2.21 $\pm$ 0.04  | 1.72 $\pm$ 0.02   | 1012 $\pm$ 0.74   | 1.64 $\pm$ 0.028         | 2.38 $\pm$ 0.05          |
|                      |            | 1.0       | 82.0 $\pm$ 0.32        | 71.0 $\pm$ 0.32              | 2.95 $\pm$ 0.05  | 1.80 $\pm$ 0.021  | 729.1 $\pm$ 0.39  | 2.13 $\pm$ 0.036         | 3.09 $\pm$ 0.07          |
|                      |            | 2.0       | 84.4 $\pm$ 0.32        | 73.2 $\pm$ 0.32              | 3.68 $\pm$ 0.06  | 2.06 $\pm$ 0.02   | 922.8 $\pm$ 0.74  | 2.43 $\pm$ 0.04          | 3.53 $\pm$ 0.08          |
|                      |            | 3.0       | 90.4 $\pm$ 0.32        | 78.70 $\pm$ 0.32             | 2.95 $\pm$ 0.05  | 1.93 $\pm$ 0.023  | 956.1 $\pm$ 3.86  | 2.56 $\pm$ 0.043         | 3.71 $\pm$ 0.08          |
| Blue Pearl           | 0.0        | 0.0       | 0.0 $\pm$ 0.0          | 0.00 $\pm$ 0.00              | 0.00 $\pm$ 0.00  | 0.00 $\pm$ 0.00   | 479.8 $\pm$ 0.78  | 2.49 $\pm$ 0.036         | 3.09 $\pm$ 0.07          |
|                      |            | 1.0       | 0.0 $\pm$ 0.0          | 245.90 $\pm$ 0.00            | 3.68 $\pm$ 0.06  | 0.73 $\pm$ 0.009  | 974.4 $\pm$ 0.78  | 1.99 $\pm$ 0.03          | 2.47 $\pm$ 0.05          |
|                      |            | 2.0       | 277.6 $\pm$ 0.32       | 258.0 $\pm$ 0.32             | 3.68 $\pm$ 0.06  | 0.77 $\pm$ 0.009  | 905.6 $\pm$ 0.78  | 3.05 $\pm$ 0.045         | 3.79 $\pm$ 0.08          |
|                      |            | 3.0       | 281.2 $\pm$ 0.32       | 256.9 $\pm$ 0.32             | 2.95 $\pm$ 0.05  | 0.69 $\pm$ 0.008  | 686.1 $\pm$ 0.78  | 3.69 $\pm$ 0.054         | 4.59 $\pm$ 0.10          |
|                      | 0.5        | 0.0       | 173.2 $\pm$ 0.32       | 165.6 $\pm$ 0.32             | 2.95 $\pm$ 0.05  | 0.73 $\pm$ 0.009  | 893.5 $\pm$ 0.78  | 1.78 $\pm$ 0.026         | 2.21 $\pm$ 0.05          |
|                      |            | 1.0       | 164.8 $\pm$ 0.32       | 159.0 $\pm$ 0.32             | 2.21 $\pm$ 0.04  | 0.82 $\pm$ 0.01   | 989.6 $\pm$ 0.78  | 2.49 $\pm$ 0.04          | 3.09 $\pm$ 0.07          |
|                      |            | 2.0       | 161.2 $\pm$ 0.32       | 154.6 $\pm$ 0.32             | 2.95 $\pm$ 0.05  | 1.29 $\pm$ 0.015  | 899.5 $\pm$ 0.78  | 2.77 $\pm$ 0.04          | 3.44 $\pm$ 0.07          |
|                      |            | 3.0       | 170.8 $\pm$ 0.32       | 165.6 $\pm$ 0.32             | 4.42 $\pm$ 0.07  | 1.03 $\pm$ 0.012  | 990.6 $\pm$ 0.78  | 3.20 $\pm$ 0.047         | 3.97 $\pm$ 0.09          |
|                      | 1.0        | 0.0       | 164.8 $\pm$ 0.32       | 165.6 $\pm$ 0.32             | 2.21 $\pm$ 0.04  | 1.72 $\pm$ 0.02   | 1156 $\pm$ 0.78   | 2.13 $\pm$ 0.03          | 2.65 $\pm$ 0.06          |
|                      |            | 1.0       | 161.2 $\pm$ 0.32       | 153.5 $\pm$ 0.32             | 2.95 $\pm$ 0.05  | 1.89 $\pm$ 0.022  | 985.5 $\pm$ 0.78  | 2.34 $\pm$ 0.034         | 2.91 $\pm$ 0.06          |
|                      |            | 2.0       | 149.2 $\pm$ 0.32       | 139.2 $\pm$ 0.32             | 3.68 $\pm$ 0.06  | 2.23 $\pm$ 0.026  | 946.1 $\pm$ 0.78  | 2.84 $\pm$ 0.04          | 3.53 $\pm$ 0.08          |
|                      |            | 3.0       | 163.6 $\pm$ 0.32       | 153.5 $\pm$ 0.32             | 2.95 $\pm$ 0.05  | 2.15 $\pm$ 0.025  | 1065 $\pm$ 0.78   | 3.69 $\pm$ 0.05          | 4.59 $\pm$ 0.10          |
|                      | 1.5        | 0.0       | 169.6 $\pm$ 0.32       | 173.3 $\pm$ 0.32             | 2.21 $\pm$ 0.04  | 1.89 $\pm$ 0.022  | 1132 $\pm$ 0.78   | 1.78 $\pm$ 0.026         | 2.21 $\pm$ 0.05          |
|                      |            | 1.0       | 91.6 $\pm$ 0.32        | 101.8 $\pm$ 0.32             | 3.68 $\pm$ 0.06  | 1.98 $\pm$ 0.023  | 1027 $\pm$ 0.78   | 2.77 $\pm$ 0.04          | 3.44 $\pm$ 0.07          |
|                      |            | 2.0       | 92.8 $\pm$ 0.32        | 93.0 $\pm$ 0.32              | 4.42 $\pm$ 0.07  | 2.15 $\pm$ 0.03   | 1032 $\pm$ 0.78   | 2.98 $\pm$ 0.044         | 3.71 $\pm$ 0.08          |
|                      |            | 3.0       | 96.4 $\pm$ 0.32        | 104.0 $\pm$ 0.32             | 2.95 $\pm$ 0.05  | 1.98 $\pm$ 0.023  | 1025 $\pm$ 0.78   | 3.20 $\pm$ 0.05          | 3.97 $\pm$ 0.09          |
| Serene Blue          | 0.0        | 0.0       | 0.0 $\pm$ 0.0          | 0.00 $\pm$ 0.00              | 0.00 $\pm$ 0.00  | 0.00 $\pm$ 0.00   | 473.9 $\pm$ 7.96  | 2.51 $\pm$ 0.03          | 3.54 $\pm$ 0.02          |
|                      |            | 1.0       | 0.0 $\pm$ 0.0          | 0.00 $\pm$ 0.00              | 0.00 $\pm$ 0.00  | 0.00 $\pm$ 0.00   | 962.0 $\pm$ 16.2  | 2.45 $\pm$ 0.03          | 3.45 $\pm$ 0.02          |
|                      |            | 2.0       | 274.0 $\pm$ 0.26       | 247.0 $\pm$ 0.26             | 2.95 $\pm$ 0.05  | 0.86 $\pm$ 0.01   | 894.0 $\pm$ 15.0  | 3.35 $\pm$ 0.039         | 4.71 $\pm$ 0.03          |
|                      |            | 3.0       | 288.4 $\pm$ 0.26       | 260.2 $\pm$ 0.26             | 3.68 $\pm$ 0.06  | 0.08 $\pm$ 0.001  | 777.5 $\pm$ 4.97  | 3.87 $\pm$ 0.045         | 5.44 $\pm$ 0.04          |
|                      | 0.5        | 0.0       | 175.6 $\pm$ 0.26       | 173.3 $\pm$ 0.26             | 1.47 $\pm$ 0.02  | 0.77 $\pm$ 0.009  | 882.1 $\pm$ 14.8  | 2.45 $\pm$ 0.03          | 3.45 $\pm$ 0.02          |
|                      |            | 1.0       | 160.0 $\pm$ 0.26       | 159.0 $\pm$ 0.26             | 2.21 $\pm$ 0.04  | 0.86 $\pm$ 0.01   | 976.9 $\pm$ 16.4  | 2.45 $\pm$ 0.03          | 3.45 $\pm$ 0.02          |
|                      |            | 2.0       | 162.4 $\pm$ 0.26       | 159.0 $\pm$ 0.26             | 3.68 $\pm$ 0.06  | 1.29 $\pm$ 0.015  | 888.1 $\pm$ 14.9  | 2.58 $\pm$ 0.03          | 3.63 $\pm$ 0.03          |
|                      |            | 3.0       | 173.2 $\pm$ 0.26       | 173.3 $\pm$ 0.26             | 4.42 $\pm$ 0.07  | 1.20 $\pm$ 0.014  | 977.9 $\pm$ 16.4  | 3.55 $\pm$ 0.043         | 4.99 $\pm$ 0.03          |
|                      | 1.0        | 0.0       | 167.2 $\pm$ 0.26       | 179.9 $\pm$ 0.26             | 2.21 $\pm$ 0.04  | 1.89 $\pm$ 0.022  | 1143 $\pm$ 19.2   | 2.26 $\pm$ 0.026         | 3.17 $\pm$ 0.02          |
|                      |            | 1.0       | 161.2 $\pm$ 0.26       | 165.6 $\pm$ 0.26             | 2.95 $\pm$ 0.05  | 1.98 $\pm$ 0.023  | 972.9 $\pm$ 16.3  | 2.39 $\pm$ 0.028         | 3.35 $\pm$ 0.02          |
|                      |            | 2.0       | 152.8 $\pm$ 0.26       | 55.6 $\pm$ 0.26              | 4.42 $\pm$ 0.07  | 2.23 $\pm$ 0.026  | 934.1 $\pm$ 15.7  | 2.84 $\pm$ 0.033         | 3.99 $\pm$ 0.03          |
|                      |            | 3.0       | 166.0 $\pm$ 0.26       | 173.3 $\pm$ 0.26             | 2.95 $\pm$ 0.05  | 2.15 $\pm$ 0.025  | 1052 $\pm$ 17.6   | 3.42 $\pm$ 0.04          | 4.81 $\pm$ 0.03          |
|                      | 1.5        | 0.0       | 172.0 $\pm$ 0.26       | 173.3 $\pm$ 0.26             | 1.47 $\pm$ 0.02  | 1.98 $\pm$ 0.023  | 1118 $\pm$ 18.7   | 2.39 $\pm$ 0.028         | 3.35 $\pm$ 0.02          |
|                      |            | 1.0       | 91.6 $\pm$ 0.26        | 93.0 $\pm$ 0.26              | 2.95 $\pm$ 0.05  | 2.15 $\pm$ 0.025  | 1014 $\pm$ 17.0   | 2.90 $\pm$ 0.034         | 4.08 $\pm$ 0.03          |
|                      |            | 2.0       | 96.4 $\pm$ 0.26        | 104.0 $\pm$ 0.26             | 4.42 $\pm$ 0.07  | 2.23 $\pm$ 0.03   | 1019 $\pm$ 17.1   | 2.58 $\pm$ 0.03          | 3.63 $\pm$ 0.03          |
|                      |            | 3.0       | 100.0 $\pm$ 0.26       | 113.90 $\pm$ 0.26            | 2.95 $\pm$ 0.05  | 2.06 $\pm$ 0.024  | 1012 $\pm$ 16.9   | 3.16 $\pm$ 0.04          | 4.44 $\pm$ 0.03          |
| White Pearl          | 0.0        | 0.0       | 0.0 $\pm$ 0.0          | 0.00 $\pm$ 0.00              | 0.00 $\pm$ 0.00  | 0.00 $\pm$ 0.00   | 330.0 $\pm$ 5.5   | 1.98 $\pm$ 0.042         | 2.36 $\pm$ 0.03          |
|                      |            | 1.0       | 0.0 $\pm$ 0.0          | 0.00 $\pm$ 0.00              | 0.00 $\pm$ 0.00  | 0.00 $\pm$ 0.00   | 603.1 $\pm$ 5.6   | 1.69 $\pm$ 0.04          | 2.02 $\pm$ 0.03          |
